# Supplementary material for: Optimizing the Profile of [99mTc]Tc–NT(7–13) Tracers in Pancreatic Cancer Models by Means of Protease Inhibitors
Source: MDPI journal article supplement (doi:10.3390/ijms21217926), 2020-10-26
Supplement: s1 [file s1]

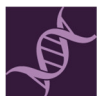

## Supplemental Materials

# Optimizing the Profile of [ $^{99m}\text{Tc}$ ]Tc-NT(7–13) Tracers in Pancreatic Cancer Models by Means of Protease Inhibitors

Panagiotis Kanellopoulos <sup>1,2,\*</sup>, Berthold A. Nock <sup>1</sup>, Eric P. Krenning <sup>3</sup> and Theodosia Maina <sup>1,\*</sup>

<sup>1</sup> Molecular Radiopharmacy, INRASTES, NCSR “Demokritos”, 15341 Athens, Greece; nock\_berthold.a@hotmail.com

<sup>2</sup> Molecular Pharmacology, School of Medicine, University of Crete, Heraklion, 70013 Crete, Greece

<sup>3</sup> Cyclotron Rotterdam BV, Erasmus MC, 3015 CE Rotterdam, The Netherlands; erickrenning@gmail.com

\* Correspondence: kanelospan@gmail.com (P.K.); maina\_thea@hotmail.com (T.M.);  
Tel.: +30-210-650-3891 (P.K.); +30-210-650-3908 (T.M.)

(a)

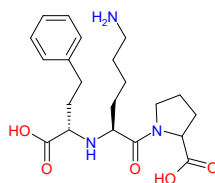

(b)

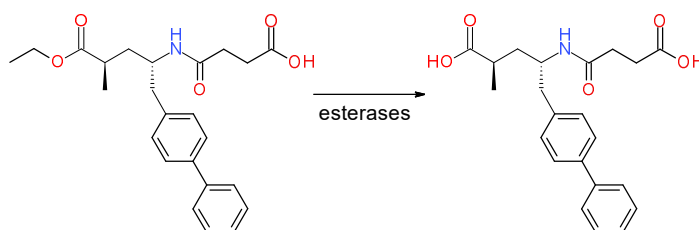

**Figure S1.** Structure of (a) the angiotensin converting enzyme (ACE)-inhibitor lisinopril (Lis) and (b) the structure of sacubitril (AHU377) found in the drug Entresto, releasing the active substance sacubitrilat (LBQ657) in vivo upon ester-hydrolysis by esterases; sacubitrilat is a potent and specific inhibitor of neprilysin (NEP).

**Table S1.** Cellular uptake (membrane bound and internalized of total-added activity) of [ $^{99m}\text{Tc}$ ]Tc-DT1 at 1 h incubation across cell lines, expressed as mean $\pm$ SD, including specific and non-specific portions.

| Cell line |                           | MB <sup>1</sup> | I <sup>2</sup>   |
|-----------|---------------------------|-----------------|------------------|
| AsPC-1    | specific                  | 0.98 $\pm$ 0.42 | 14.11 $\pm$ 2.28 |
|           | non-specific <sup>3</sup> | 0.67 $\pm$ 0.23 | 0.88 $\pm$ 0.59  |
| PANC-1    | specific                  | 0.76 $\pm$ 0.39 | 7.30 $\pm$ 2.41  |
|           | non-specific              | 0.44 $\pm$ 0.20 | 0.29 $\pm$ 0.12  |
| MiaPaca-2 | specific                  | 0.37 $\pm$ 0.23 | 2.46 $\pm$ 0.23  |
|           | non-specific              | 0.87 $\pm$ 0.49 | 0.50 $\pm$ 0.36  |
| Capan-1   | specific                  | 0.10 $\pm$ 0.01 | 0.28 $\pm$ 0.13  |
|           | non-specific              | 0.20 $\pm$ 0.02 | 0.11 $\pm$ 0.02  |

<sup>1</sup> MB, membrane bound fraction; <sup>2</sup> I, internalized fraction; non-specific values determined by incubation in the presence of 1  $\mu\text{M}$  NT; these values were subtracted from the respective measured MB/I fractions to calculate the respective specific values.

**Table S2.** Biodistribution data for [ $^{99m}\text{Tc}$ ]Tc-DT1, expressed as %IA/g mean $\pm$ SD, in MiaPaca-2 xenograft-bearing SCID mice treated with the Entresto+Lis combination at 4 h pi.

| Tissue     | [ $^{99m}\text{Tc}$ ]Tc-DT1 – 4 h pi |
|------------|--------------------------------------|
|            | Entresto+Lis <sup>2</sup>            |
| Blood      | 0.06 $\pm$ 0.01                      |
| Liver      | 0.57 $\pm$ 0.04                      |
| Heart      | 0.08 $\pm$ 0.02                      |
| Kidneys    | 5.86 $\pm$ 0.14                      |
| Stomach    | 0.37 $\pm$ 0.05                      |
| Intestines | 2.43 $\pm$ 0.6                       |
| Spleen     | 0.49 $\pm$ 0.03                      |
| Muscle     | 0.03 $\pm$ 0.01                      |
| Lungs      | 0.43 $\pm$ 0.04                      |
| Pancreas   | 0.1 $\pm$ 0.02                       |
| Tumor      | 1.97 $\pm$ 0.25                      |

All animals were injected with 185 kBq/10 pmol peptide; Entresto+Lis mice group (n = 4) with animals receiving 12 mg Entresto per os 30 min prior to radiotracer co-injection together with 200  $\mu\text{g}$  Lis to in situ inhibit NEP and ACE, respectively.
